# Supplementary material for: A Design of Experiment Approach to Optimize Spray-Dried Powders Containing Pseudomonas aeruginosaPodoviridae and Myoviridae Bacteriophages
Source: MDPI journal article supplement (doi:10.3390/v13101926), 2021-09-24
Supplement: s1 [file s1]

Supplementary Material

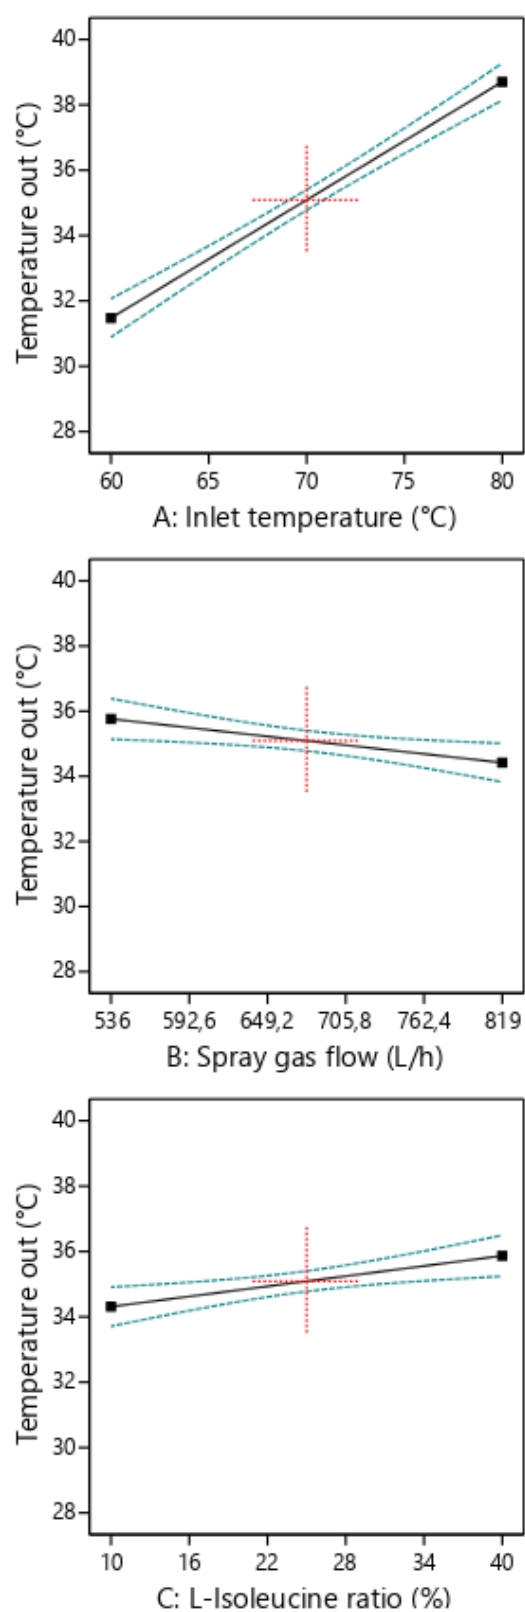

**Figure S1.** Temperature outlet, one-factor effect graphs with 95% CI bands for the LUZ19 experiments.

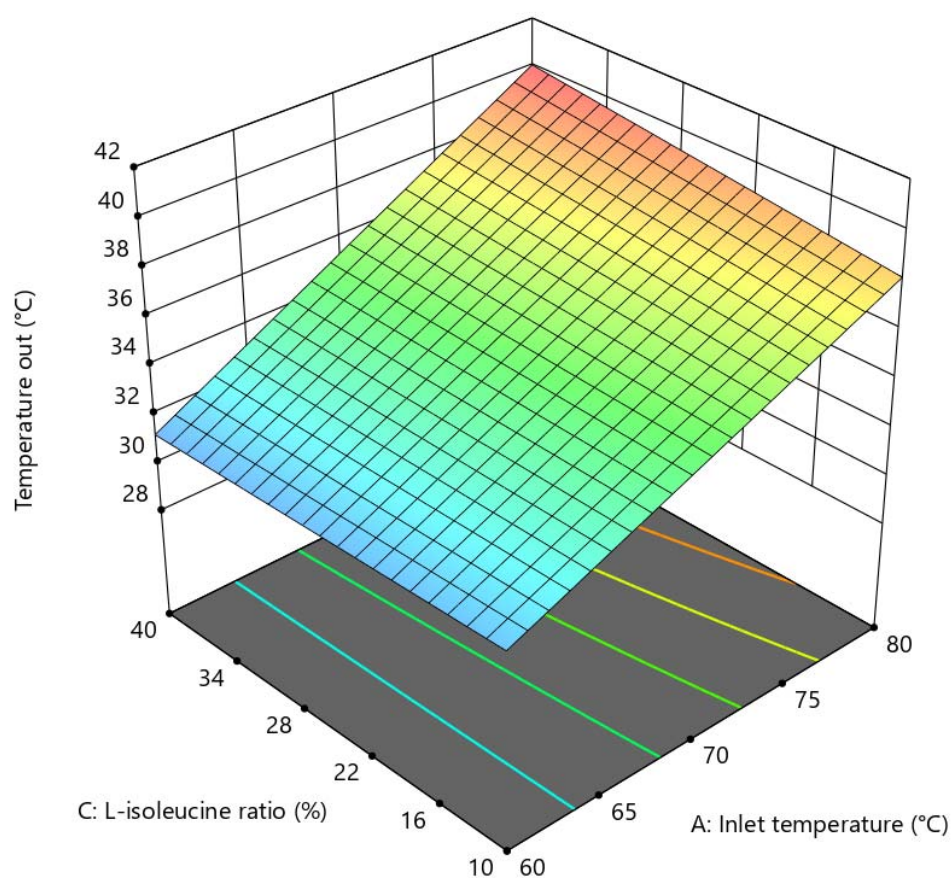

**Figure S2.** Temperature outlet, 3D surface graph for 14-1.

**Table S1.** Fit statistics for the models.

|                                        | LUZ19   | 14-1   |
|----------------------------------------|---------|--------|
| <b>Outlet temperature (°C)</b>         |         |        |
| R <sup>2</sup>                         | 0.9248  | 0.9676 |
| Adjusted R <sup>2</sup>                | 0.9141  | 0.9608 |
| Predicted R <sup>2</sup>               | 0.8448  | 0.9213 |
| Adeq precision                         | 24.3143 | 33.333 |
| <b>Process yield (%)</b>               |         |        |
| R <sup>2</sup>                         | 0.7924  | 0.7242 |
| Adjusted R <sup>2</sup>                | 0.7628  | 0.6782 |
| Predicted R <sup>2</sup>               | 0.5875  | 0.4153 |
| <b>Residual moisture content (%)</b>   |         |        |
| R <sup>2</sup>                         | 0.7835  | 0.8870 |
| Adjusted R <sup>2</sup>                | 0.7732  | 0.8814 |
| Predicted R <sup>2</sup>               | 0.6215  | 0.7810 |
| <b>Loss of activity (Log10 PFU/mg)</b> |         |        |
| R <sup>2</sup>                         | 0,7930  | 0,6612 |
| Adjusted R <sup>2</sup>                | 0,7516  | 0,5721 |
| Predicted R <sup>2</sup>               | 0,5720  | 0,2424 |

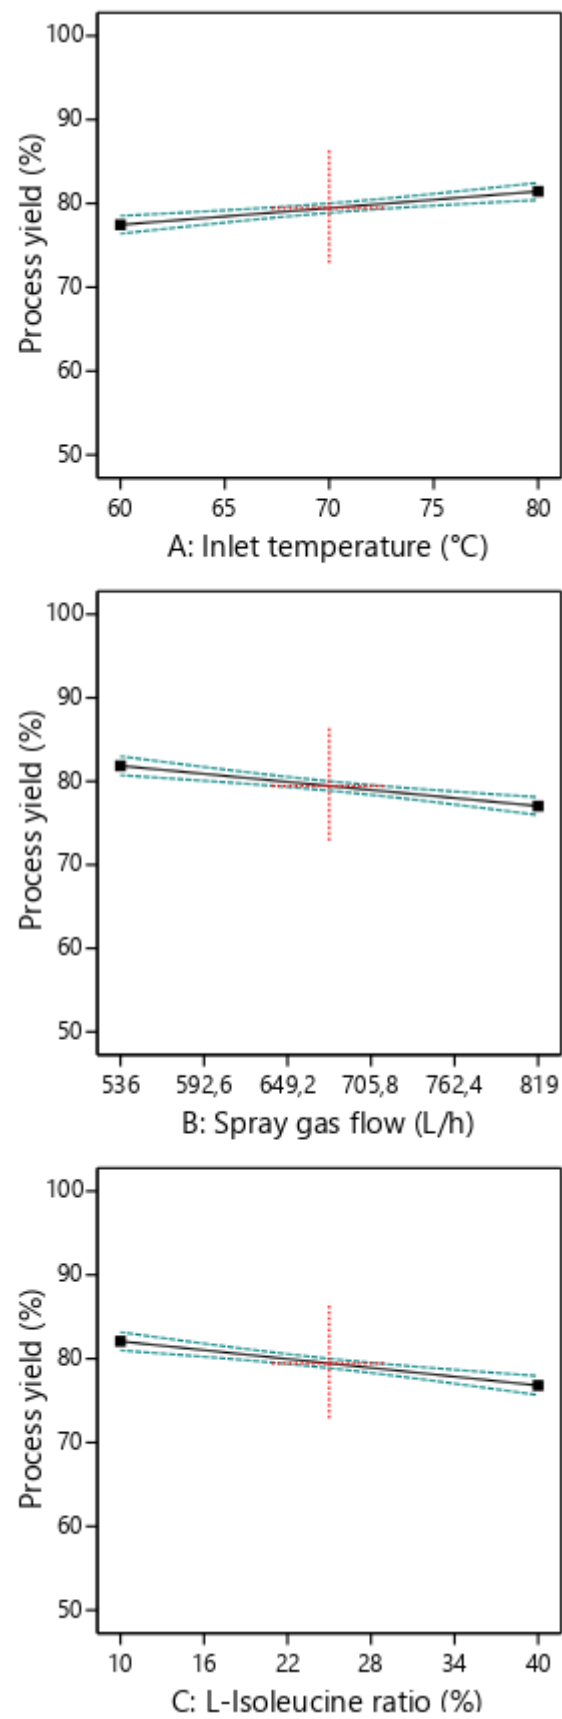

**Figure S3.** Process yield, one-factor effect graphs with 95% CI bands for the LUZ19 experiments.

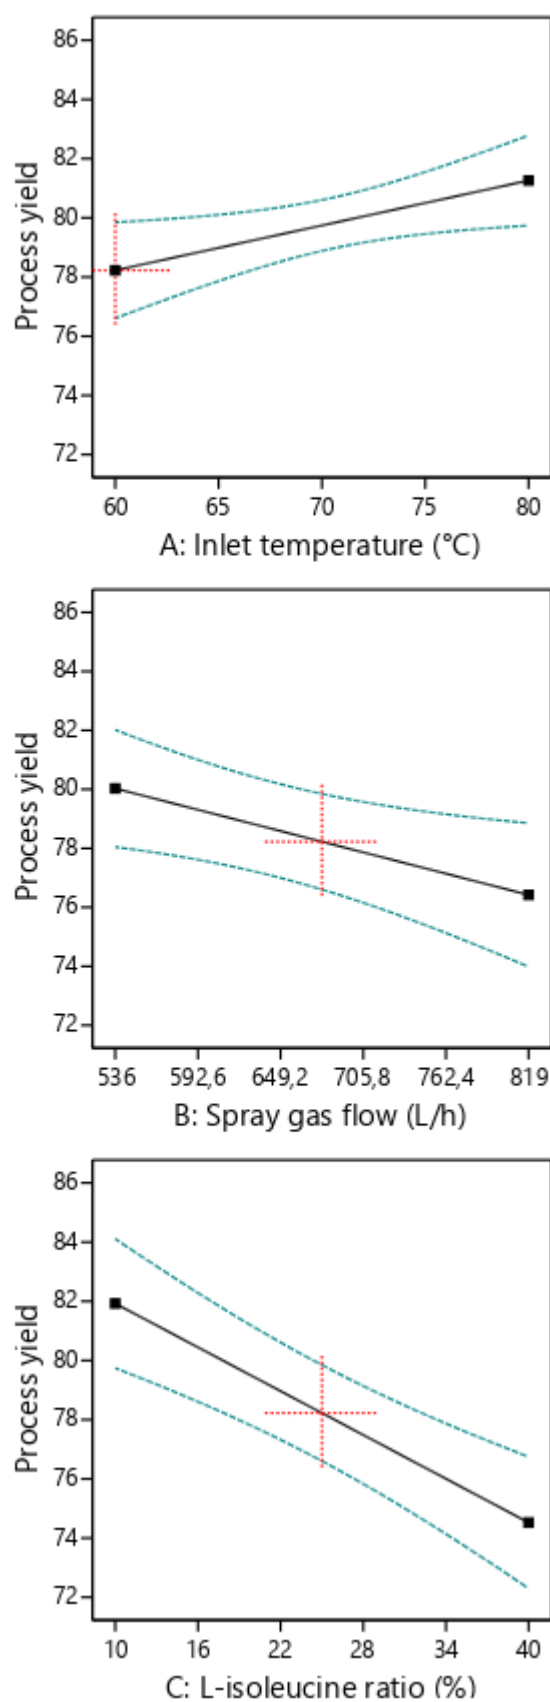

**Figure S4.** Process yield, one-factor effect graphs with 95% CI bands for the 14-1 experiments.

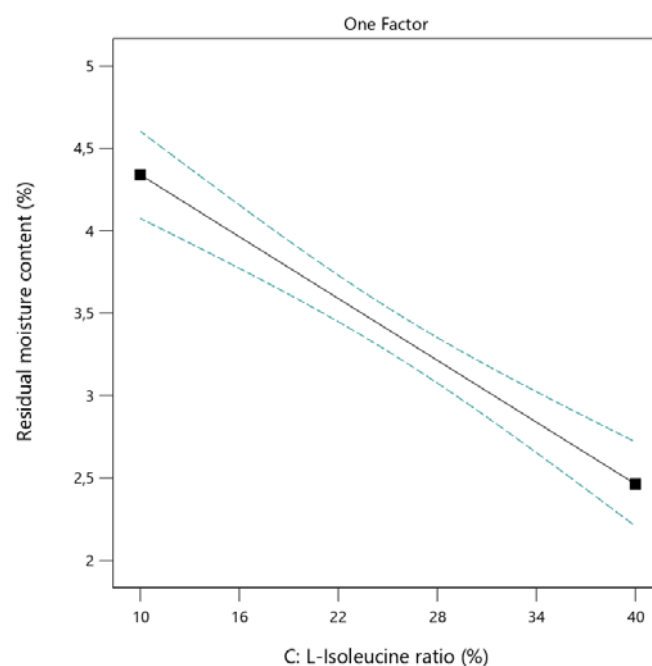

**Figure S5.** RMC, one-factor effect graphs with 95% CI bands for the LUZ19 experiments.

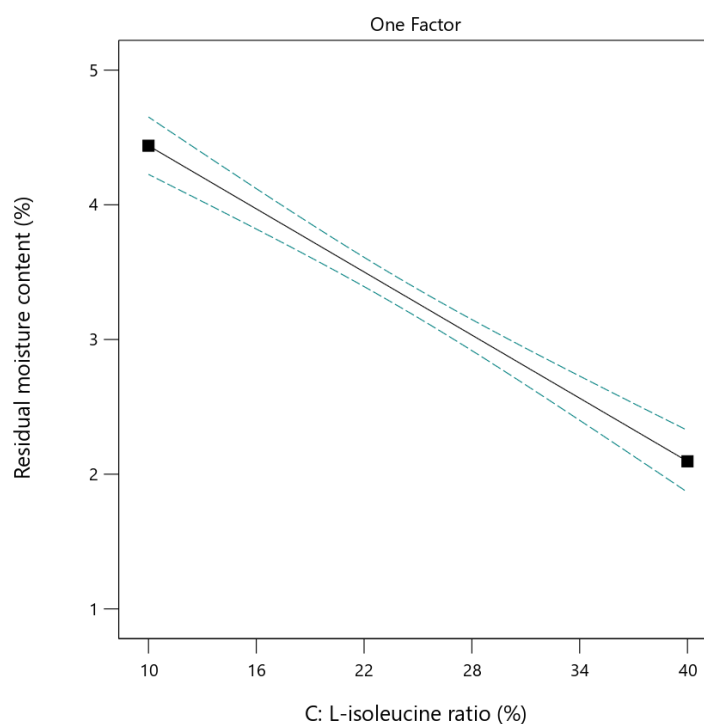

**Figure S6.** RMC, one-factor effect graphs with 95% CI bands for the 14-1 experiments.

**A**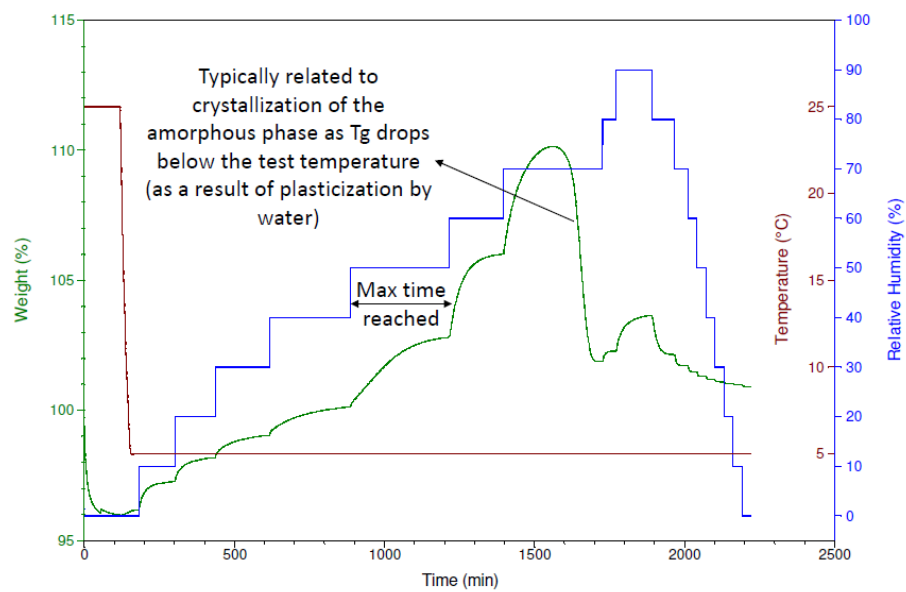**B**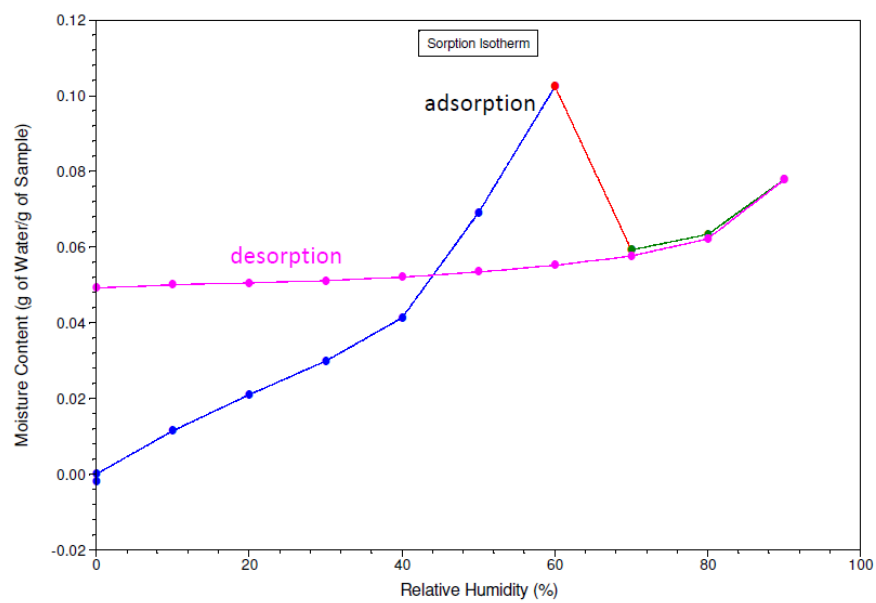

**C**

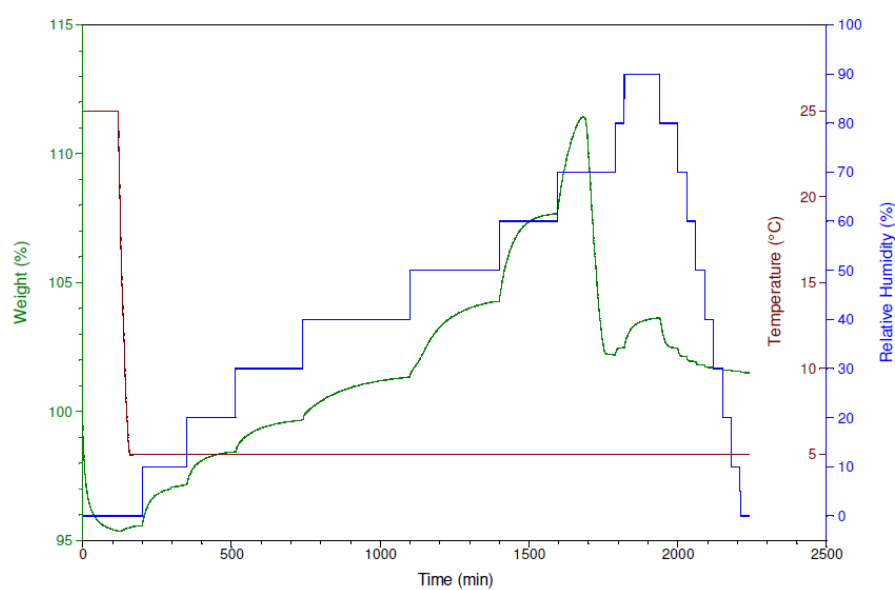

**D**

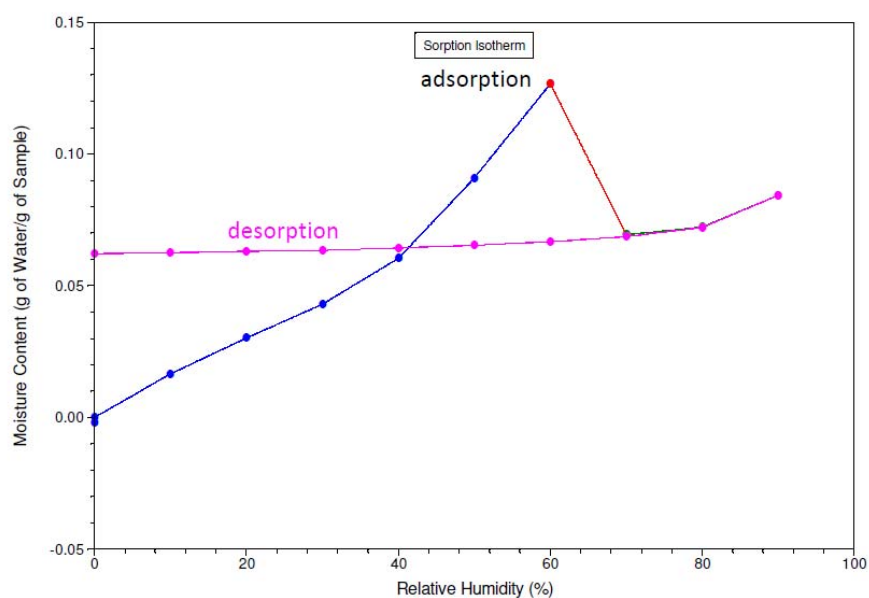

**E**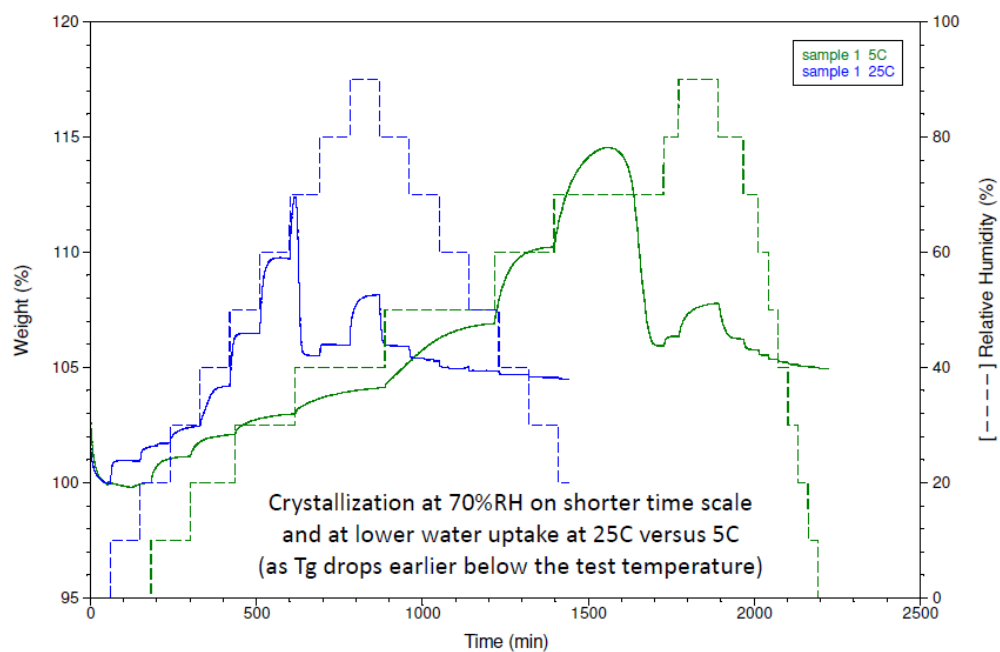**F**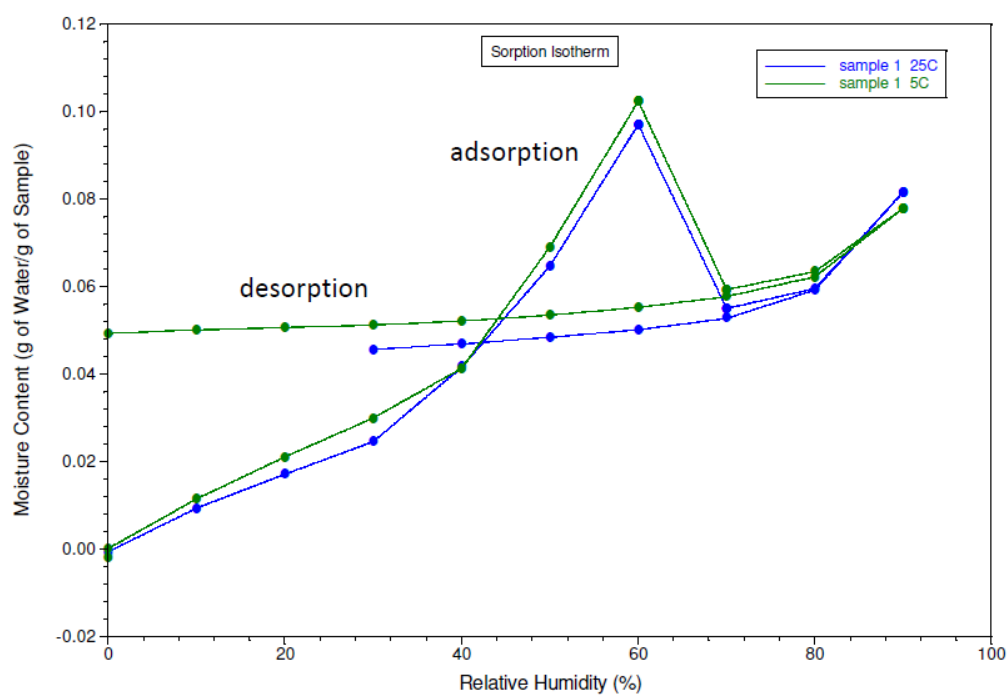

**Figure S1.** Dynamic Vapor Sorption (DVS) analyses for optimized spray-dried powder containing LUZ19 (A & B) and 14-1 (C&D) at +5 °C, as well as LUZ19 at +25 °C (E & F).

**A**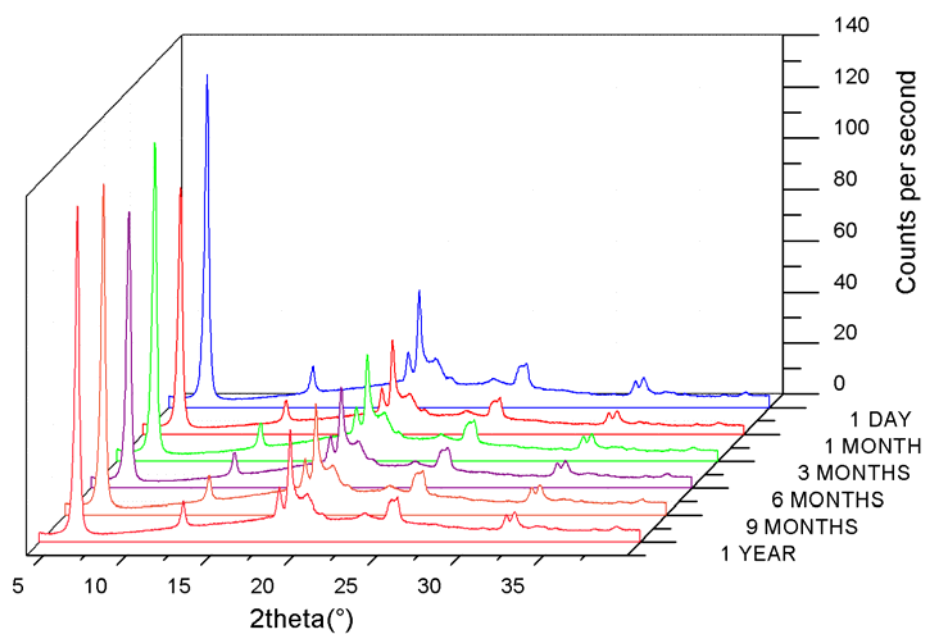**B**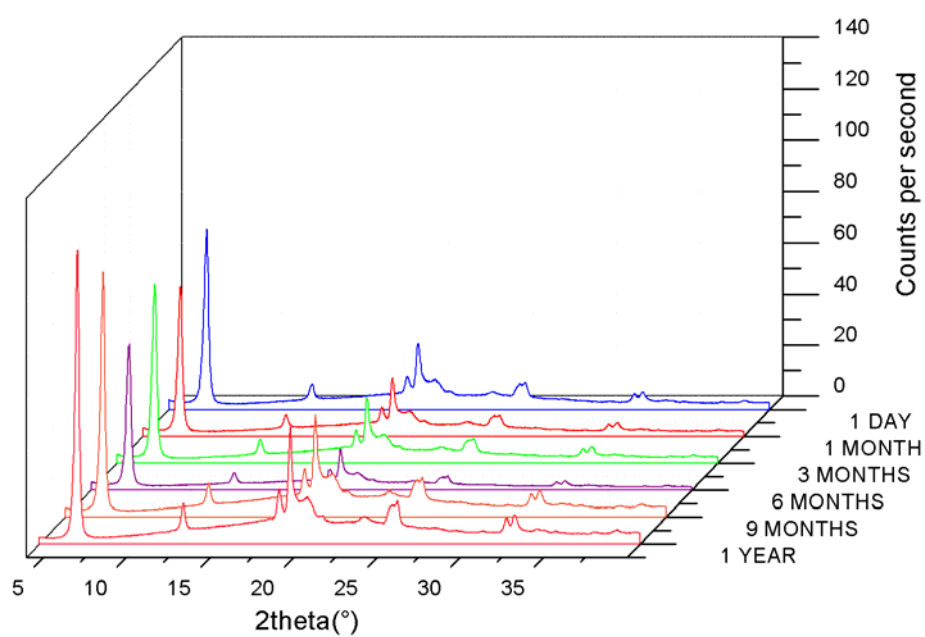

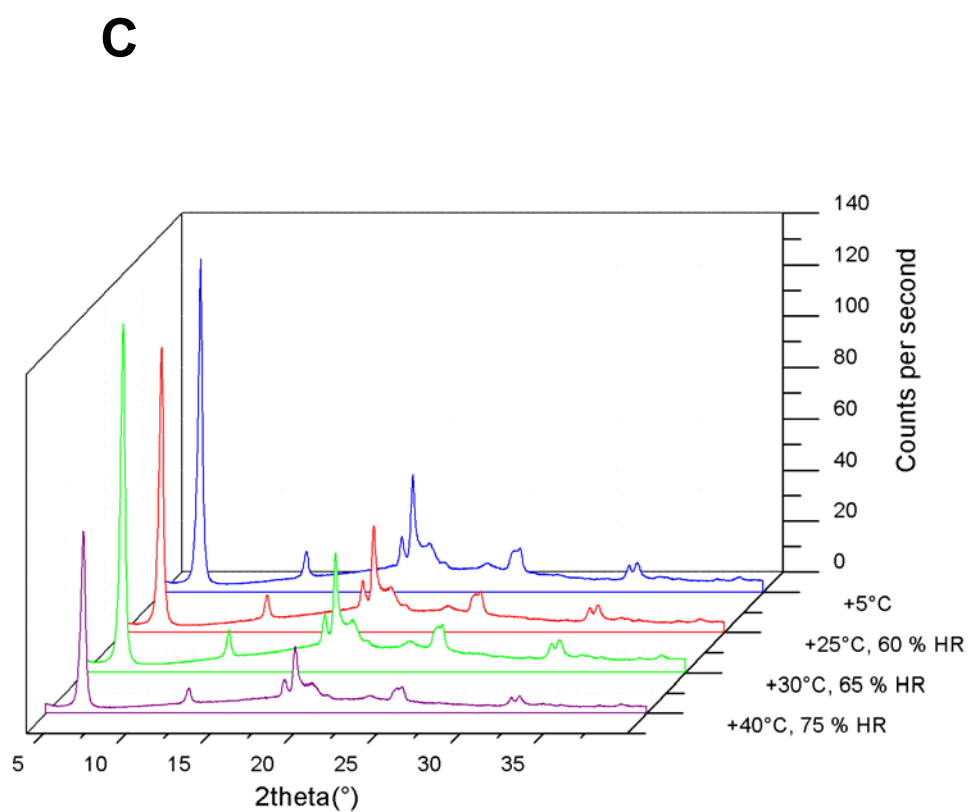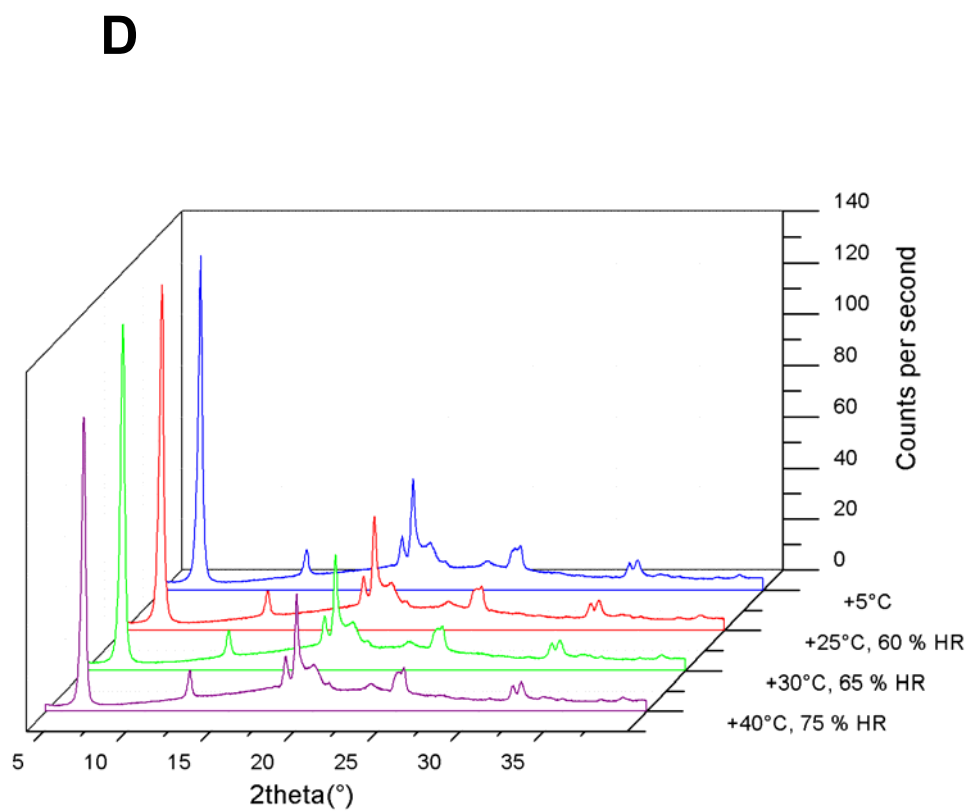

**Figure S8.** XRD profiles of optimized spray-dried powder containing LUZ19 stored at 5 °C (A) and 40 °C, 75% RH (B) over time, and at day 1 (C) and at 1 year (D) storage under different ICH conditions.

**A**

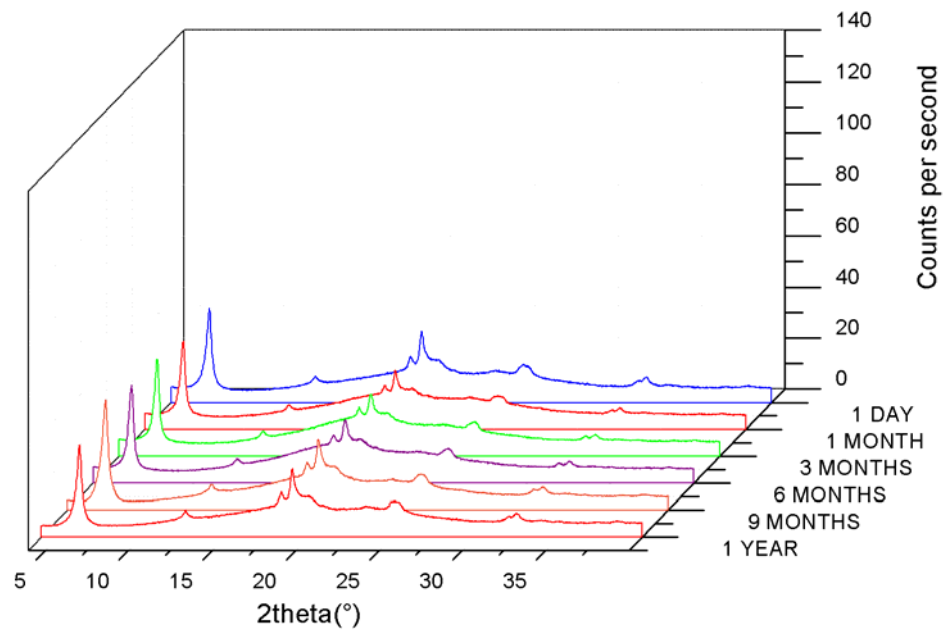

**B**

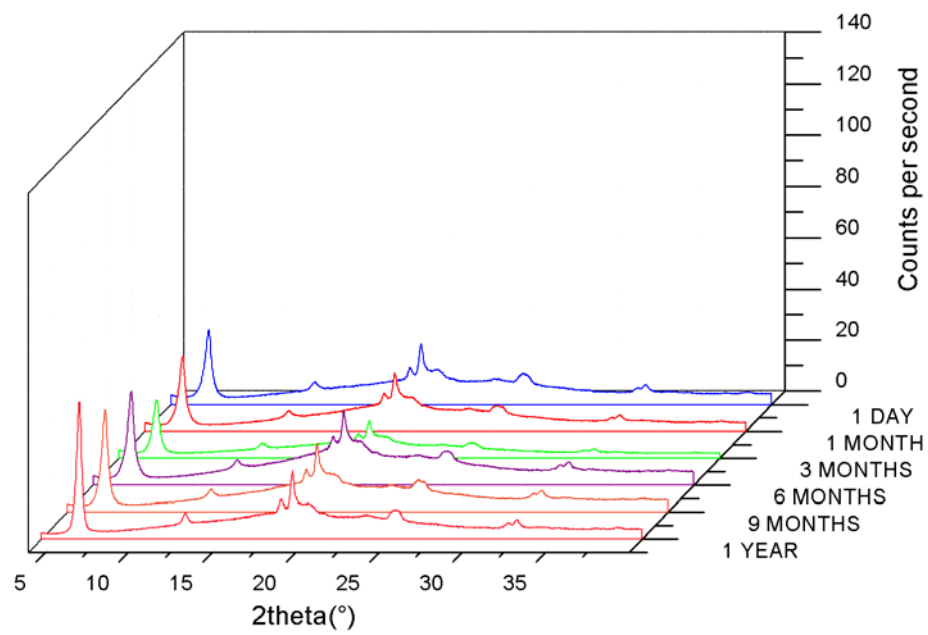

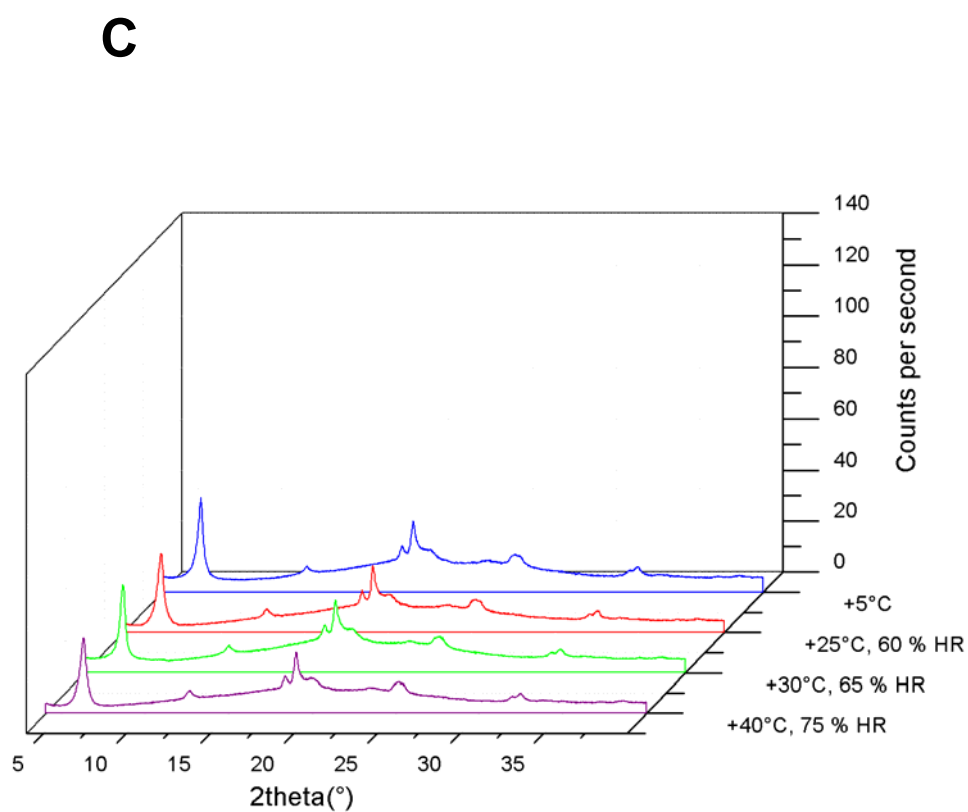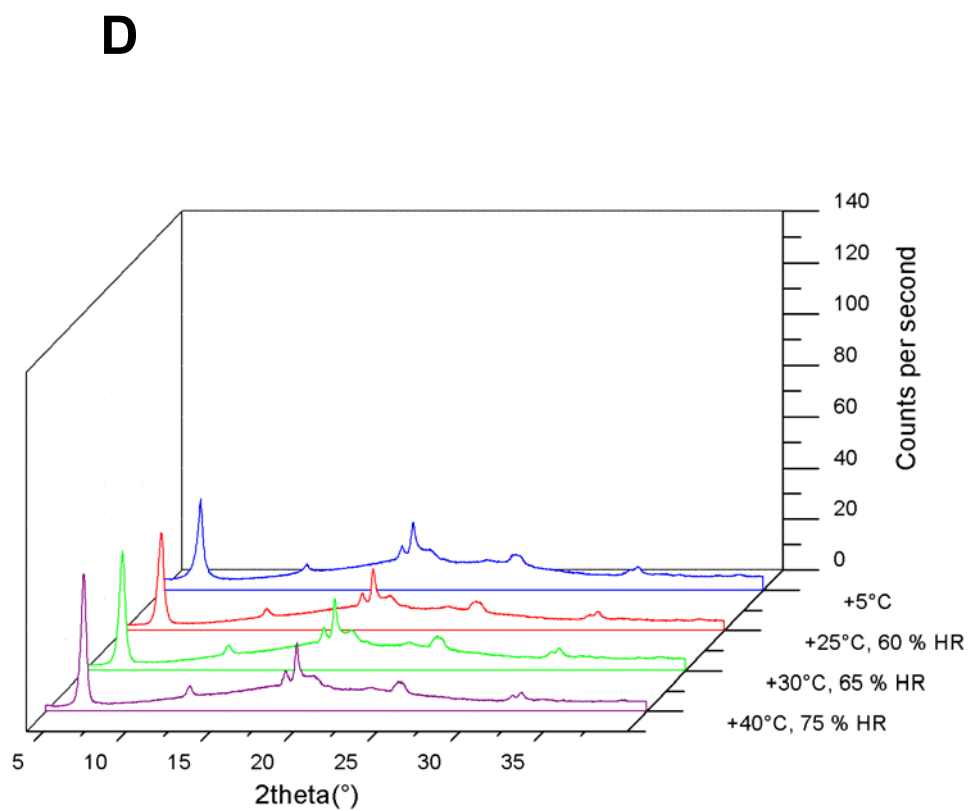

**Figure S9.** XRD profiles of optimized spray-dried powder containing 14-1 stored at 5 °C (A) and 40 °C, 75% RH (B) over time, and at day 1 (C) and at 1 year (D) of storage under different ICH conditions.
